# Supplementary material for: Whole blood microRNA levels associate with glycemic status and correlate with target mRNAs in pathways important to type 2 diabetes
Source: Springer Nature journal article supplement (doi:10.1038/s41598-019-43793-4), 2019-06-20
Supplement: MOESM1 [file 41598_2019_43793_MOESM1_ESM.pdf › 41598_2019_43793_MOESM1_ESM.pdf]

## Supplementary material

### Whole blood microRNA levels associate with glycemic status and correlate with target mRNAs in pathways important to type 2 diabetes

Nina Mononen, PhD; Leo-Pekka Lyytikäinen, MD; Ilkka Seppälä, MD, PhD; Pashupati P Mishra, MSc; Markus Juonala, MD, PhD; Melanie Waldenberger, PhD; Norman Klopp, PhD; Thomas Illig, MD, PhD; Jaana Leiviskä, PhD; Britt-Marie Loo, PhD; Reijo Laaksonen, MD, PhD; Niku Oksala, MD, PhD, DSc; Mika Kähönen, MD, PhD; Nina Hutri-Kähönen, MD, PhD; Olli Raitakari, MD, PhD; Terho Lehtimäki, MD, PhD, Emma Raitoharju, PhD

#### Table of Contents

|                                                                                 |    |
|---------------------------------------------------------------------------------|----|
| Supplementary Figures .....                                                     | 2  |
| Supplementary Figure S1 .....                                                   | 2  |
| Supplementary Figure S2 .....                                                   | 3  |
| Supplementary Figure S3 .....                                                   | 4  |
| Supplementary Tables.....                                                       | 5  |
| Supplementary Table S1 .....                                                    | 5  |
| Supplementary Table S2.....                                                     | 6  |
| Supplementary Table S3.....                                                     | 8  |
| Supplementary Table S4.....                                                     | 9  |
| Supplementary Table S5.....                                                     | 10 |
| Supplementary Table S6.....                                                     | 11 |
| Supplementary Table S7.....                                                     | 12 |
| Supplementary Table S8.....                                                     | 13 |
| Supplementary Table S9.....                                                     | 14 |
| Supplementary Materials and Methods .....                                       | 15 |
| The Young Finns Study (YFS) .....                                               | 15 |
| Clinical and biochemical measurements .....                                     | 15 |
| Categorizing individuals according to T2D and glycemic status .....             | 16 |
| Whole blood RNA isolation, quality control, and miRNA expression profiling..... | 16 |
| Serum RNA isolation and miRNA expression profiling.....                         | 16 |
| Genome-wide expression analysis (transcriptomics) .....                         | 17 |
| Statistical analysis .....                                                      | 17 |
| Supplementary references.....                                                   | 19 |

## Supplementary Figures

**Supplementary Figure S1.** Blood levels of hsa-miR-144-5p and hsa-let-7a-5p in normoglycemic individuals (NG), individuals with impaired fasting glucose (IFG), and individuals with type 2 diabetes (T2D), analyzed from the whole blood of a subset (n=72) of the YFS 2011 follow-up with Human MiRNA Microarray Release 14.0, 8 × 15 K (Agilent). The trend over groups is analyzed using the Kruskal–Wallis test (dash line) and the differences between groups by the Mann-Whitney U test (solid line). We can see a similar pattern of expression in hsa-miR-144-5p and hsa-let-7a-5p between the glycemic status groups to the pattern shown with the larger population analyzed with TaqMan Openarray and were even able to replicate the nominally significant difference between the NG and IFG groups in has-let-7a-5p levels (p=0.003) and the borderline significant result in hsa-miR-144-5p levels (p=0.061).

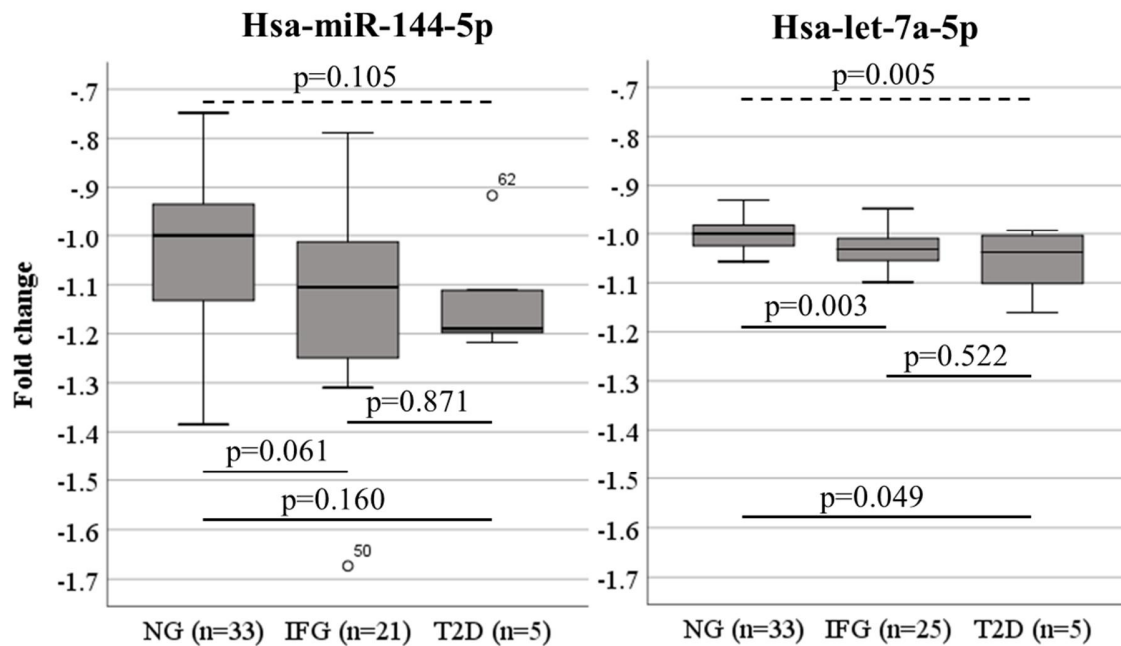

**Supplementary Figure S2.** Serum levels of hsa-miR-122-5p in normoglycemic individuals (NG), individuals with impaired fasting glucose (IFG), and individuals with type 2 diabetes (T2D), analyzed from the serum of a subset (n=146) of the YFS 2011 follow-up with the TaqMan® OpenArray® MicroRNA Panel. The trend over the groups is analyzed using the Kruskal–Wallis test (dash line) and the differences between the groups by the Mann-Whitney U test (solid line). We can see a similar pattern of expression in hsa-miR-122-5p between the glycemic status groups to the one shown with the larger population analyzed from whole blood and were even able to replicate the nominally significant difference between the NG and IFG groups and the trend over the glycemic status groups.

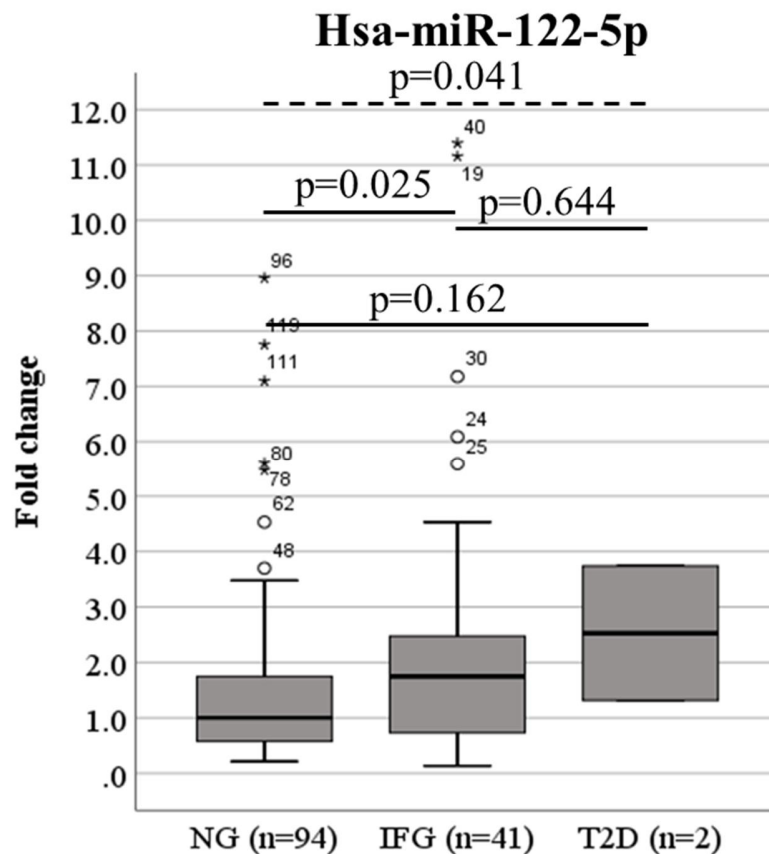

**Supplementary Figure S3.** Correlation plot between the miRNAs of interest in whole blood. Associations were evaluated with Spearman’s rank-order correlation, and only associations with a nominal  $p < 0.05$  are shown with a circle.

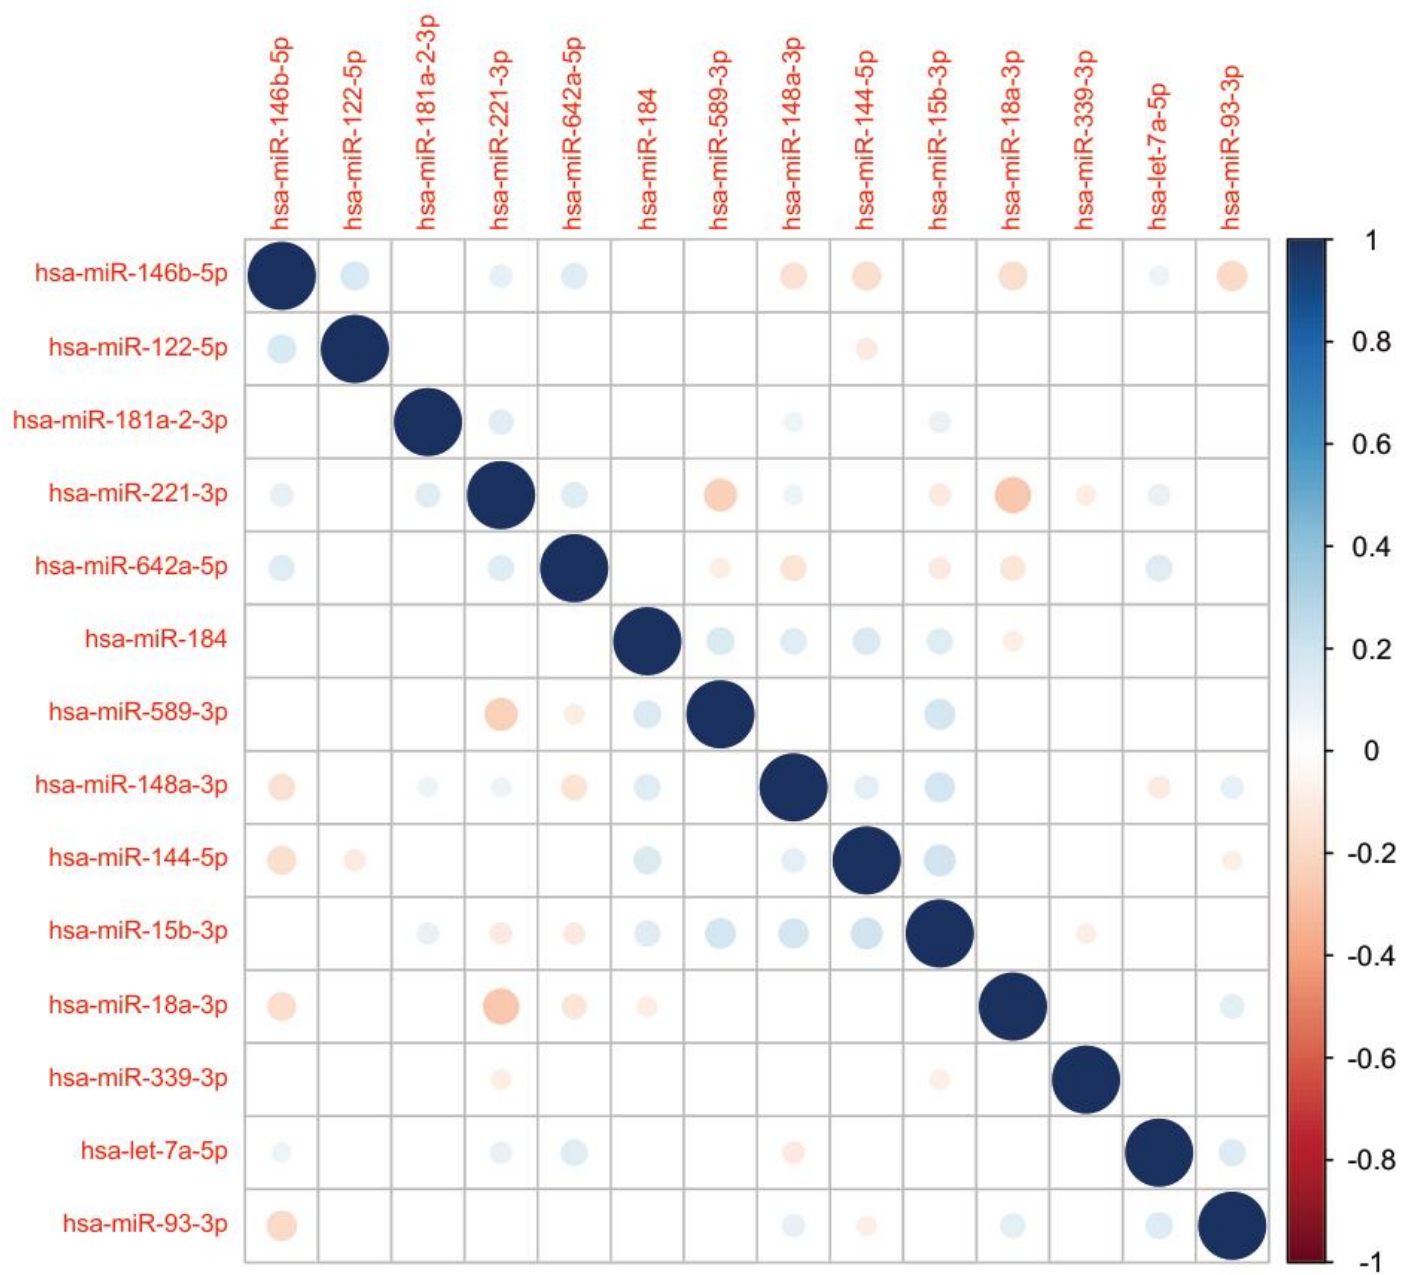

## Supplementary Tables

**Supplementary Table S1.** Associations between miRNAs and the individuals' glycemic status (normoglycemic [NG]/ impaired fasting glucose [IFG]/type 2 diabetes [T2D]). Associations were evaluated with the Mann-Whitney U test and stepwise logistic regression models. Fold changes (FC) describe the magnitude of the difference with the Mann-Whitney U test, while odds ratios (OR) are shown with regression

|                | IFG vs NG |          |                  | T2D vs NG |          |                  | T2D vs IFG |          |                  |
|----------------|-----------|----------|------------------|-----------|----------|------------------|------------|----------|------------------|
|                | n         | p        | FC/OR (95% CI)   | n         | p        | FC/OR (95% CI)   | n          | p        | FC/OR (95% CI)   |
| hsa-miR-144-5p |           |          |                  |           |          |                  |            |          |                  |
| <i>U-test</i>  | 779       | 2.35E-06 | 0.91             | 553       | 0.033    | 0.90             | 274        | 0.761    | 0.99             |
| <i>Model 1</i> | 776       | 7.42E-05 | 0.71 (0.60-0.84) | 551       | 0.043    | 0.63 (0.40-0.98) | 273        | NS       | NS               |
| <i>Model 2</i> | 746       | 3.64E-04 | 0.73 (0.61-0.87) | 532       | NS       | NS               | 260        | NS       | NS               |
| hsa-let-7a-5p  |           |          |                  |           |          |                  |            |          |                  |
| <i>U-test</i>  | 781       | 6.39E-06 | -1.08            | 556       | 0.823    | 0.98             | 273        | 0.145    | 1.08             |
| <i>Model 1</i> | 778       | 3.00E-04 | 0.74 (0.62-0.87) | 554       | NS       | NS               | 272        | NS       | NS               |
| <i>Model 2</i> | 747       | 4.50E-04 | 0.73 (0.61-0.87) | 535       | NS       | NS               | 258        | NS       | NS               |
| hsa-miR-122-5p |           |          |                  |           |          |                  |            |          |                  |
| <i>U-test</i>  | 634       | 0.006    | 1.14             | 446       | 4.80E-05 | 1.53             | 226        | 0.009    | 1.34             |
| <i>Model 1</i> | 632       | 0.146    | 1.14 (0.95-1.38) | 445       | 0.002    | 2.68 (1.47-5.16) | 225        | 0.042    | 1.64 (1.02-2.70) |
| <i>Model 2</i> | 611       | NS       | NS               | 433       | 0.010    | 2.48 (1.29-5.22) | 214        | 0.062    | 1.68 (0.99-2.98) |
| hsa-miR-589-3p |           |          |                  |           |          |                  |            |          |                  |
| <i>U-test</i>  | 781       | 0.149    | -1.03            | 555       | 1.82E-04 | 1.29             | 274        | 6.60E-05 | 1.32             |
| <i>Model 1</i> | 778       | NS       | NS               | 553       | 2.34E-04 | 2.53 (1.57-4.24) | 273        | 2.27E-04 | 2.51 (1.57-4.21) |
| <i>Model 2</i> | 747       | NS       | NS               | 534       | 3.70E-04 | 2.80 (1.63-5.11) | 259        | 1.65E-04 | 2.83 (1.70-5.05) |

models.

**Statistical model:** U-test = Mann-Whitney U test; Model 1 = Stepwise logistic regression model including an miRNA of interest (one by one), age, sex, and BMI; Model 2 = Model 1 + leukocyte, erythrocyte, and thrombocyte counts, total cholesterol, LDL, HDL, and triglyceride levels, as well as alcohol consumption and history of smoking or hypertension. **Note:** The number of samples in the regression models varies according to the number of samples in which the miRNA was expressed and also according to the availability of the variables in the regression models.

**Supplementary Table S2.** Associations of the miRNAs with serum glucose and insulin levels and the HOMA2 insulin resistance (IR) index. Associations were evaluated with Spearman's correlation and stepwise linear regression models\*.

|                 | Serum glucose |          |                          | Serum insulin levels |          |                         | HOMA2-IR |          |                         |
|-----------------|---------------|----------|--------------------------|----------------------|----------|-------------------------|----------|----------|-------------------------|
|                 | n             | p        | r/β (95% CI)             | n                    | p        | r/β (95% CI)            | n        | p        | r/β (95% CI)            |
| hsa-miR-144-5p  |               |          |                          |                      |          |                         |          |          |                         |
| Correlation     | 863           | 7.67E-07 | -0.167                   | 863                  | 1.35E-08 | -0.192                  | 860      | 1.81E-08 | -0.190                  |
| Model 1         | 860           | 1.57E-07 | -0.163 (-0.224– -0.103)  | 806                  | 8.19E-05 | -0.113 (-0.169– -0.057) | 857      | 9.99E-05 | -0.111 (-0.167– -0.055) |
| Model 2         | 769           | 1.22E-05 | -0.140 (-0.203– -0.078)  | 769                  | NS       | NS                      | 769      | NS       | NS                      |
| hsa-miR-148a-3p |               |          |                          |                      |          |                         |          |          |                         |
| Correlation     | 754           | 1.71E-04 | -0.136                   | 754                  | 0.033    | -0.078                  | 752      | 0.023    | -0.083                  |
| Model 1         | 753           | 0.002    | -0.103 (-0.168 – -0.038) | 753                  | NS       | NS                      | 751      | NS       | NS                      |
| Model 2         | 674           | 0.015    | -0.082 (-0.148 – -0.016) | 674                  | NS       | NS                      | 674      | NS       | NS                      |
| hsa-miR-122-5p  |               |          |                          |                      |          |                         |          |          |                         |
| Correlation     | 703           | 3.17E-04 | 0.135                    | 703                  | 1.49E-11 | 0.251                   | 700      | 7.37E-12 | 0.255                   |
| Model 1         | 701           | 0.125    | 0.053 (-0.015–0.120)     | 701                  | 1.52E-04 | 0.119 (0.058–0.180)     | 698      | 6.41E-05 | 0.124 (0.064–0.185)     |
| Model 2         | 629           | 0.114    | 0.055 (-0.013–0.122)     | 629                  | 2.48E-04 | 0.109 (0.051–0.167)     | 629      | 2.09E-04 | 0.110 (0.053–0.169)     |
| hsa-miR-184     |               |          |                          |                      |          |                         |          |          |                         |
| Correlation     | 822           | 0.002    | -0.108                   | 822                  | 2.86E-05 | -0.145                  | 819      | 1.03E-05 | -0.153                  |
| Model 1         | 819           | 0.074    | -0.060 (-0.119–0.005)    | 819                  | 0.001    | -0.099 (-0.157– -0.042) | 816      | 1.76E-04 | -0.109 (-0.166– -0.052) |
| Model 2         | 728           | 0.007    | -0.088 (-0.151– -0.024)  | 728                  | 0.004    | -0.080 (-0.135– -0.059) | 728      | 0.003    | -0.084 (-0.139– -0.028) |
| hsa-miR-339-3p  |               |          |                          |                      |          |                         |          |          |                         |
| Correlation     | 850           | 0.096    | -0.057                   | 850                  | 4.44E-05 | -0.140                  | 847      | 4.66E-05 | -0.139                  |
| Model 1         | 847           | NS       | NS                       | 847                  | 0.001    | -0.094 (-0.150– -0.039) | 844      | 0.001    | -0.095 (-0.150– -0.040) |
| Model 2         | 757           | 0.127    | -0.049 (-0.113–0.014)    | 757                  | 0.006    | -0.077 (-0.132– -0.022) | 757      | 0.003    | -0.083 (-0.138– -0.028) |
| hsa-miR-15b-3p  |               |          |                          |                      |          |                         |          |          |                         |
| Correlation     | 753           | 0.088    | -0.062                   | 753                  | 0.006    | -0.099                  | 750      | 0.008    | -0.096                  |
| Model 1         | 751           | 0.141    | -0.050 (-0.116–0.016)    | 751                  | 0.003    | -0.089 (-0.147– -0.030) | 748      | 0.007    | -0.082 (-0.140– -0.023) |
| Model 2         | 673           | NS       | NS                       | 673                  | 0.078    | -0.053 (-0.111–0.006)   | 673      | 0.086    | -0.052 (-0.110–0.007)   |
| hsa-miR-93-3p   |               |          |                          |                      |          |                         |          |          |                         |
| Correlation     | 868           | 0.656    | -0.015                   | 868                  | 0.053    | -0.066                  | 865      | 0.045    | -0.068                  |
| Model 1         | 865           | NS       | NS                       | 865                  | 0.036    | -0.060 (-0.115– -0.004) | 862      | 0.019    | -0.066 (-0.121– -0.011) |
| Model 2         | 773           | NS       | NS                       | 773                  | NS       | NS                      | 773      | NS       | NS                      |
| hsa-miR-146b-5p |               |          |                          |                      |          |                         |          |          |                         |
| Correlation     | 868           | 0.674    | 0.014                    | 868                  | 0.011    | 0.086                   | 865      | 0.014    | 0.084                   |
| Model 1         | 865           | NS       | NS                       | 865                  | NS       | NS                      | 862      | NS       | NS                      |
| Model 2         | 772           | 0.144    | -0.047 (-0.111–0.016)    | 772                  | NS       | NS                      | 772      | NS       | NS                      |
| hsa-miR-221-3p  |               |          |                          |                      |          |                         |          |          |                         |
| Correlation     | 868           | 0.975    | -0.001                   | 868                  | 0.013    | 0.085                   | 865      | 0.015    | 0.082                   |
| Model 1         | 865           | NS       | NS                       | 865                  | NS       | NS                      | 862      | NS       | NS                      |
| Model 2         | 772           | NS       | NS                       | 772                  | NS       | NS                      | 772      | NS       | NS                      |
| hsa-miR-18a-3p  |               |          |                          |                      |          |                         |          |          |                         |
| Correlation     | 864           | 0.426    | 0.027                    | 864                  | 0.277    | -0.037                  | 861      | 0.274    | -0.037                  |
| Model 1         | 861           | NS       | NS                       | 861                  | NS       | NS                      | 858      | NS       | NS                      |

|                    |     |       |       |     |       |        |     |       |        |
|--------------------|-----|-------|-------|-----|-------|--------|-----|-------|--------|
| <i>Model 2</i>     | 770 | NS    | NS    | 770 | NS    | NS     | 770 | NS    | NS     |
| hsa-miR-181a-2-3p  |     |       |       |     |       |        |     |       |        |
| <i>Correlation</i> | 867 | 0.318 | 0.034 | 867 | 0.129 | 0.052  | 864 | 0.098 | 0.056  |
| <i>Model 1</i>     | 864 | NS    | NS    | 864 | NS    | NS     | 861 | NS    | NS     |
| <i>Model 2</i>     | 773 | NS    | NA    | 773 | NS    | NS     | 773 | NS    | NS     |
| hsa-miR-642a-5p    |     |       |       |     |       |        |     |       |        |
| <i>Correlation</i> | 868 | 0.364 | 0.031 | 868 | 0.316 | -0.034 | 865 | 0.307 | -0.035 |
| <i>Model 1</i>     | 865 | NS    | NS    | 865 | NS    | NS     | 862 | NS    | NS     |
| <i>Model 2</i>     | 772 | NS    | NS    | 772 | NS    | NS     | 772 | NS    | NS     |

**\*Statistical model:** Correlation = Spearman's correlation; Model 1 = Stepwise regression model including a miRNA of interest (one by one), age, sex, and BMI; Model 2 = Model 1 + leukocyte, erythrocyte, an thrombocyte counts, total cholesterol, LDL, HDL, and triglyceride levels, as well as glycemic status, alcohol consumption, and history of smoking or hypertension. **Note:** The number of samples in the regression models varies according to the number of samples in which the miRNA was expressed and also according to the availability of the variables in the regression models.

**Supplementary Table S3.** Associations between miRNAs and glycated hemoglobin (HbA1c) levels and percentages. Associations were evaluated with Spearman's correlation and stepwise linear regression models\*.

|                   | HbA1c levels |          |                        | HbA1c % |             |                        |
|-------------------|--------------|----------|------------------------|---------|-------------|------------------------|
|                   | n            | p        | r/β (95% CI)           | n       | p           | r/β (95% CI)           |
| hsa-miR-144-5p    |              |          |                        |         |             |                        |
| Correlation       | 862          | 8.05E-05 | -0.134                 | 862     | 5.80E-05    | -0.137                 |
| Model 1           | 859          | 0.009    | -0.086 (-0.149--0.021) | 859     | 0.009       | -0.084 (-0.148--0.021) |
| Model 2           | 769          | 0.051    | -0.068 (-0.137--0.000) | 769     | 0.053       | -0.068 (-0.136--0.001) |
| hsa-miR-148a-3p   |              |          |                        |         |             |                        |
| Correlation       | 754          | 1.39E-05 | -0.158                 | 754     | 9.39E-06    | -0.161                 |
| Model 1           | 753          | 7.72E-05 | -0.135 (-0.202--0.068) | 853     | 6.00E-05    | -0.137 (-0.203--0.070) |
| Model 2           | 674          | 5.05E-05 | -0.140 (-0.207--0.073) | 674     | 3.74E-05    | -0.143 (-0.210--0.075) |
| hsa-miR-122-5p    |              |          |                        |         |             |                        |
| Correlation       | 702          | 3.58E-04 | 0.134                  | 702     | 2.23E-04    | 0.139                  |
| Model 1           | 700          | 0.004    | 0.105 (0.034--0.177)   | 700     | 0.004       | 0.107 (0.035--0.179)   |
| Model 2           | 629          | 0.005    | 0.104 (0.032--0.176)   | 629     | 0.005       | 0.104 (0.032--0.176)   |
| hsa-miR-184       |              |          |                        |         |             |                        |
| Correlation       | 821          | 0.434    | -0.027                 | 821     | 0.529       | -0.022                 |
| Model 1           | 818          | NS       | NS                     | 818     | NS          | NS                     |
| Model 2           | 728          | NS       | NS                     | 728     | NS          | NS                     |
| hsa-miR-339-3p    |              |          |                        |         |             |                        |
| Correlation       | 849          | 0.252    | -0.039                 | 849     | 0.330       | -0.033                 |
| Model 1           | 846          | NS       | NS                     | 846     | NS          | NS                     |
| Model 2           | 757          | NS       | NS                     | 757     | NS          | NS                     |
| hsa-miR-15b-3p    |              |          |                        |         |             |                        |
| Correlation       | 753          | 0.001    | -0.121                 | 753     | 1.27E-04    | -0.139                 |
| Model 1           | 751          | 1.80E-04 | -0.128 (-0.195--0.062) | 751     | 5.55E-05    | -0.138 (-0.205--0.071) |
| Model 2           | 673          | 0.065    | -0.065 (-0.134--0.004) | 673     | 0.031       | -0.075 (-0.144--0.007) |
| hsa-miR-93-3p     |              |          |                        |         |             |                        |
| Correlation       | 867          | 3.29E-06 | -0.157                 | 867     | 5.78E-06    | -0.153                 |
| Model 1           | 864          | 8.73E-07 | -0.157 (-0.219--0.095) | 864     | 1.11E-06    | -0.155 (-0.217--0.093) |
| Model 2           | 773          | 8.21E-06 | -0.145 (-0.208--0.082) | 773     | 1.06E-05    | -0.143 (-0.206--0.080) |
| hsa-miR-146b-5p   |              |          |                        |         |             |                        |
| Correlation       | 867          | 3.32E-06 | 0.157                  | 867     | 2.39E-06    | 0.159                  |
| Model 1           | 864          | 9.57E-05 | 0.126 (0.063--0.188)   | 864     | 9.39E-05    | 0.126 (0.063--0.188)   |
| Model 2           | 772          | 8.05E-05 | 0.123 (0.058--0.188)   | 772     | 0.000258326 | 0.122 (0.057--0.187)   |
| hsa-miR-221-3p    |              |          |                        |         |             |                        |
| Correlation       | 867          | 9.62E-05 | 0.132                  | 867     | 2.74E-04    | 0.123                  |
| Model 1           | 864          | 1.82E-04 | 0.120 (0.058--0.183)   | 864     | 0.001       | 0.109 (0.046--0.171)   |
| Model 2           | 772          | 0.006    | 0.095 (0.027--0.162)   | 772     | 0.014       | 0.085 (0.018--0.152)   |
| hsa-miR-18a-3p    |              |          |                        |         |             |                        |
| Correlation       | 863          | 1.30E-04 | -0.130                 | 863     | 1.18E-04    | -0.131                 |
| Model 1           | 860          | 0.001    | -0.109 (-0.172--0.046) | 860     | 0.001       | -0.106 (-0.169--0.042) |
| Model 2           | 770          | 0.002    | -0.104 (-0.169--0.040) | 770     | 0.002       | -0.102 (-0.167--0.037) |
| hsa-miR-181a-2-3p |              |          |                        |         |             |                        |
| Correlation       | 866          | 2.50E-05 | 0.143                  | 866     | 2.92E-05    | 0.142                  |
| Model 1           | 863          | 1.62E-04 | 0.121 (0.042--0.184)   | 863     | 2.10E-04    | 0.119 (0.053--0.182)   |
| Model 2           | 773          | 0.001    | 0.110 (0.045--0.174)   | 773     | 0.001       | 0.106 (0.041--0.170)   |
| hsa-miR-642a-5p   |              |          |                        |         |             |                        |
| Correlation       | 867          | 4.51E-07 | 0.170                  | 867     | 7.95E-07    | 0.167                  |
| Model 1           | 864          | 8.46E-08 | 0.171 (0.109--0.233)   | 871     | 1.73E-07    | 0.167 (0.105--0.229)   |
| Model 2           | 772          | 8.70E-08 | 0.176 (0.112--0.239)   | 772     | 1.54E-07    | 0.173 (0.109--0.236)   |

\***Statistical model:** Correlation = Spearman correlation; Model 1 = Stepwise regression model including the miRNA of interest (one by one), age, sex, and BMI; Model 2 = Model 1 + leukocyte, erythrocyte, and thrombocyte counts, total cholesterol, LDL, HDL, and triglyceride levels, as well as glycemic status, alcohol consumption, and history of smoking or hypertension. **Note:** The number of samples in the regression models varies according to the number of samples in which the miRNA was expressed and also according to the availability of the variables in the regression models.



**Supplementary Table S4.** Associations of miRNAs with serum glucose and insulin levels and the HOMA2 insulin resistance index in normoglycemic (NG) individuals and individuals with impaired fasting glucose (IFG) separately. Associations were evaluated with Spearman's correlation and stepwise linear regression models\*.

|                                | Serum glucose |          |                       | Insulin |          |                       | HOMA2-IR |          |                         |
|--------------------------------|---------------|----------|-----------------------|---------|----------|-----------------------|----------|----------|-------------------------|
|                                | n             | p        | r/β (95% CI)          | n       | p        | r/β (95% CI)          | n        | p        | r/β (95% CI)            |
| <b>In NG individuals</b>       |               |          |                       |         |          |                       |          |          |                         |
| hsa-miR-589-3p                 |               |          |                       |         |          |                       |          |          |                         |
| Correlation                    | 532           | 0.321    | -0.043                | 531     | 0.007    | -0.117                | 531      | 0.007    | -0.117                  |
| Model 1                        | 529           | NS       | NS                    | 529     | 0.045    | -0.077 (-0.152–0.002) | 529      | 0.049    | -0.075 (-0.150–0.000)   |
| Model 2                        | 511           | NS       | NS                    | 511     | 0.028    | -0.083 (-0.158–0.009) | 511      | 0.028    | -0.084 (-0.158- -0.009) |
| hsa-miR-221-3p                 |               |          |                       |         |          |                       |          |          |                         |
| Correlation                    | 531           | .656     | 0.019                 | 531     | 0.089    | 0.078                 | 531      | 0.089    | 0.074                   |
| Model 1                        | 526           | NS       | NS                    | 529     | NS       | NS                    | 529      | NS       | NS                      |
| Model 2                        | 511           | NS       | NS                    | 511     | NS       | NS                    | 511      | NS       | NS                      |
| hsa-miR-454-5p                 |               |          |                       |         |          |                       |          |          |                         |
| Correlation                    | 441           | 0.149    | 0.067                 | 441     | 0.836    | 0.010                 | 441      | 0.818    | 0.011                   |
| Model 1                        | 440           | NS       | NS                    | 440     | NS       | NS                    | 440      | NS       | NS                      |
| Model 2                        | 425           | NS       | NS                    | 425     | NS       | NS                    | 425      | NS       | NS                      |
| hsa-miR-642a-5p                |               |          |                       |         |          |                       |          |          |                         |
| Correlation                    | 533           | 0.651    | 0.020                 | 533     | 0.245    | -0.050                | 533      | 0.248    | -0.050                  |
| Model 1                        | 531           | NS       | NS                    | 531     | NS       | NS                    | 531      | NS       | NS                      |
| Model 2                        | 513           | NS       | NS                    | 513     | NS       | NS                    | 513      | NS       | NS                      |
| <b>In individuals with IFG</b> |               |          |                       |         |          |                       |          |          |                         |
| hsa-miR-885-5p                 |               |          |                       |         |          |                       |          |          |                         |
| Correlation                    | 250           | 9.00E-05 | 0.244                 | 250     | 0.038    | 0.131                 | 250      | 0.029    | 0.138                   |
| Model 1                        | 249           | 0.007    | 0.169 (0.048–0.291)   | 249     | 0.010    | 0.135 (0.034–0.236)   | 249      | 0.007    | 0.142 (0.040–0.243)     |
| Model 2                        | 237           | 0.014    | 0.152 (0.031–0.273)   | 237     | 0.016    | 0.121 (0.024–0.219)   | 237      | 0.012    | 0.127 (0.029–0.226)     |
| hsa-miR-106b-5p                |               |          |                       |         |          |                       |          |          |                         |
| Correlation                    | 252           | 9.20E-05 | 0.244                 | 252     | 0.048    | 0.124                 | 252      | 0.036    | 0.132                   |
| Model 1                        | 251           | 2.82E-04 | 0.223 (0.104–0.341)   | 251     | 0.090    | 0.089 (-0.014–0.192)  | 251      | 0.064    | 0.098 (-0.005–0.202)    |
| Model 2                        | 238           | 0.001    | 0.197 (0.078–0.316)   | 238     | 0.052    | 0.097 (-0.000–0.195)  | 238      | 0.036    | 0.106 (0.007–0.204)     |
| hsa-miR-122-5p                 |               |          |                       |         |          |                       |          |          |                         |
| Correlation                    | 207           | 0.407    | 0.058                 | 207     | 8.42E-07 | 0.334                 | 207      | 9.31E-07 | 0.333                   |
| Model 1                        | 206           | NS       | NS                    | 206     | 2.81E-04 | 0.206 (0.097–0.315)   | 206      | 3.00E-04 | 0.206 (0.096–0.315)     |
| Model 2                        | 196           | NS       | NS                    | 196     | 8.83E-04 | 0.18 (0.076–0.286)    | 196      | 0.001    | 0.180 (0.075–0.286)     |
| hsa-miR-146b-5p                |               |          |                       |         |          |                       |          |          |                         |
| Correlation                    | 250           | 0.062    | -0.118                | 250     | 0.295    | 0.067                 | 250      | 0.339    | 0.061                   |
| Model 1                        | 249           | 0.098    | -0.104 (-0.226–0.018) | 249     | NS       | NS                    | 249      | NS       | NS                      |
| Model 2                        | 236           | 0.018    | -0.153 (-0.279–0.027) | 236     | NS       | NS                    | 236      | NS       | NS                      |

**\*Statistical model:** Correlation = Spearman's correlation; Model 1 = Stepwise regression model including the miRNA of interest (one by one), age, sex, and BMI; Model 2 = Model 1 + leukocyte, erythrocyte, and thrombocyte counts, total cholesterol, LDL, HDL, and triglyceride levels, as well as glycemic status, alcohol consumption, and history of smoking or hypertension **Note:** The number of samples in the regression models varies according to the number of samples in which the miRNA was expressed and also according to the availability of the variables in the regression models.

**Supplementary Table S5.** Associations between miRNAs and glycated hemoglobin (HbA1c) levels and percentage in normoglycemic (NG) individuals and individuals with impaired fasting glucose (IFG) separately. Associations were evaluated with Spearman's correlation and stepwise linear regression models\*.

|                                | HbA1c |          |                        | HbA1c % |          |                        |
|--------------------------------|-------|----------|------------------------|---------|----------|------------------------|
|                                | n     | p        | r/β (95% CI)           | n       | p        | r/β (95% CI)           |
| <b>In NG individuals</b>       |       |          |                        |         |          |                        |
| hsa-miR-589-3p                 |       |          |                        |         |          |                        |
| Correlation                    | 531   | 1.80E-05 | -0.185                 | 531     | 4.80E-05 | -0.175                 |
| Model 1                        | 529   | 4.61E-05 | -0.167 (-0.246--0.087) | 529     | 1.37E-04 | -0.154 (-0.233--0.075) |
| Model 2                        | 511   | 4.32E-04 | -0.146 (-0.227--0.065) | 511     | 0.001    | -0.134 (-0.214--0.054) |
| hsa-miR-221-3p                 |       |          |                        |         |          |                        |
| Correlation                    | 531   | 4.50E-05 | 0.176                  | 531     | 1.29E-04 | 0.165                  |
| Model 1                        | 529   | 4.05E-06 | 0.189 (0.109--0.268)   | 529     | 7.57E-06 | 0.181 (0.103--0.260)   |
| Model 2                        | 511   | 7.31E-05 | 0.170 (0.087--0.253)   | 511     | 9.84E-05 | 0.165 (0.083--0.247)   |
| hsa-miR-454-5p                 |       |          |                        |         |          |                        |
| Correlation                    | 441   | 2.42E-04 | -0.174                 | 441     | 1.34E-04 | -0.181                 |
| Model 1                        | 440   | 1.54E-04 | -0.170 (-0.257--0.083) | 440     | 9.94E-05 | -0.171 (-0.257--0.086) |
| Model 2                        | 425   | 5.98E-05 | -0.180 (-0.267--0.093) | 425     | 3.9E-05  | -0.182 (-0.267--0.096) |
| hsa-miR-642a-5p                |       |          |                        |         |          |                        |
| Correlation                    | 533   | 7.80E-05 | 0.170                  | 533     | 2.63E-04 | 0.157                  |
| Model 1                        | 531   | 7.20E-06 | 0.184 (0.104--0.263)   | 531     | 1.9E-05  | 0.173 (0.094--0.251)   |
| Model 2                        | 513   | 1.04E-05 | 0.182 (0.102--0.262)   | 513     | 2.42E-05 | 0.173 (0.093--0.252)   |
| <b>In individuals with IFG</b> |       |          |                        |         |          |                        |
| hsa-miR-885-5p                 |       |          |                        |         |          |                        |
| Correlation                    | 250   | 0.858    | 0.011                  | 250     | 0.812    | 0.015                  |
| Model 1                        | 249   | NS       | NS                     | 249     | NS       | NS                     |
| Model 2                        | 237   | NS       | NS                     | 237     | NS       | NS                     |
| hsa-miR-106b-5p                |       |          |                        |         |          |                        |
| Correlation                    | 252   | 0.059    | -0.119                 | 252     | 0.054    | -0.121                 |
| Model 1                        | 251   | 0.041    | -0.127 (-0.248--0.006) | 251     | 0.043    | -0.125 (-0.246--0.005) |
| Model 2                        | 238   | 0.109    | -0.100 (-0.222--0.022) | 238     | 0.095    | -0.105 (-0.227--0.024) |
| hsa-miR-122-5p                 |       |          |                        |         |          |                        |
| Correlation                    | 207   | 0.166    | 0.097                  | 207     | 0.129    | 0.106                  |
| Model 1                        | 206   | NS       | NS                     | 206     | NS       | NS                     |
| Model 2                        | 196   | NS       | NS                     | 196     | NS       | NS                     |
| hsa-miR-146b-5p                |       |          |                        |         |          |                        |
| Correlation                    | 250   | 4.90E-05 | 0.254                  | 250     | 6.30E-05 | 0.250                  |
| Model 1                        | 249   | 2.56E-05 | 0.260 (0.141--0.378)   | 249     | 4.41E-05 | 0.252 (0.133--0.371)   |
| Model 2                        | 236   | 5.87E-05 | 0.259 (0.135--0.384)   | 236     | 3.23E-05 | 0.267 (0.143--0.391)   |

**\*Statistical model:** Correlation = Spearman's correlation; Model 1 = Stepwise regression model including the miRNA of interest (one by one), age, sex, and BMI; Model 2 = Model 1 + leukocyte, erythrocyte, and thrombocyte counts, total cholesterol, LDL, HDL, and triglyceride levels, as well as glycemic status, alcohol consumption, and history of smoking or hypertension **Note:** the number of samples in the regression models varies according to the number of samples in which the miRNA was expressed and also according to the availability of the variables in the regression models.

**Supplementary Table S6.** Significant associations between the miRNAs of interest and their predicted targets in the insulin signaling pathway (KEGG hsa04910). Only predicted targets with a  $p < 0.05$  in Spearman's correlation and the linear regression model\* are presented.

| miRNA/gene ID     | Symbol in Figure 2 | Probe ID | Spearman's correlation |          |                |        | Linear regression model* |          |        |        |   |        |
|-------------------|--------------------|----------|------------------------|----------|----------------|--------|--------------------------|----------|--------|--------|---|--------|
|                   |                    |          | n                      | p        | p <sub>c</sub> | r      | n                        | p        | β      | 95%CI  |   |        |
| hsa-miR-181a-2-3p |                    |          |                        |          |                |        |                          |          |        |        |   |        |
| CRK               | CRK                | 7040014  | 739                    | 0.001    | 0.075          | -0.125 | 678                      | 0.014    | -0.094 | -0.169 | - | -0.020 |
| CBL               | CBL                | 4120037  | 739                    | 0.002    | 0.229          | -0.113 | 678                      | 0.023    | -0.086 | -0.160 | - | -0.012 |
| let-7a            |                    |          |                        |          |                |        |                          |          |        |        |   |        |
| MKNK2             | MNK                | 5050553  | 739                    | 0.001    | 0.106          | -0.121 | 677                      | 4.60E-04 | -0.136 | -0.212 | - | -0.060 |
| HK2               | HK                 | 7150661  | 739                    | 0.001    | 0.155          | 0.117  | 677                      | 0.021    | 0.085  | 0.013  | - | 0.158  |
| PRKAB2            | PHK                | 5860307  | 739                    | 0.015    | 1.000          | 0.089  | 677                      | 0.012    | 0.097  | 0.022  | - | 0.172  |
| RAPGEF1           | CRF2               | 6270037  | 739                    | 0.043    | 1.000          | 0.074  | 677                      | 0.036    | 0.082  | 0.006  | - | 0.157  |
| miR-146b-5p       |                    |          |                        |          |                |        |                          |          |        |        |   |        |
| PRKAG2            | PKA                | 1050196  | 741                    | 9.67E-07 | 1.07E-04       | -0.179 | 679                      | 1.07E-06 | -0.192 | -0.268 | - | -0.115 |
| PRKAG2            | PKA                | 3120279  | 741                    | 8.32E-05 | 0.009          | -0.144 | 679                      | 0.001    | -0.133 | -0.210 | - | -0.057 |
| RPS6KB2           | RPS6KB             | 4150136  | 741                    | 0.001    | 0.148          | 0.118  | 679                      | 0.005    | 0.109  | 0.033  | - | 0.185  |
| MAPK1             | ERK1/2             | 2570026  | 741                    | 0.001    | 0.151          | -0.117 | 679                      | 6.30E-05 | -0.149 | -0.222 | - | -0.076 |
| MKNK2             | MKNK               | 940152   | 741                    | 0.002    | 0.207          | -0.114 | 679                      | 0.001    | -0.127 | -0.203 | - | -0.051 |
| IRS2              | IRS                | 6110736  | 741                    | 0.005    | 0.573          | -0.103 | 679                      | 0.022    | -0.087 | -0.161 | - | -0.013 |
| MAPK1             | ERK1/2             | 3180398  | 741                    | 0.019    | 1.000          | -0.086 | 679                      | 0.003    | -0.113 | -0.188 | - | -0.038 |
| miR-148a-3p       |                    |          |                        |          |                |        |                          |          |        |        |   |        |
| HK1               | HK                 | 1660196  | 633                    | 2.72E-04 | 0.030          | 0.144  | 586                      | 4.15E-05 | 0.163  | 0.085  | - | 0.240  |
| MAP2K1            | MEK1/2             | 1050600  | 633                    | 0.003    | 0.299          | 0.119  | 586                      | 0.030    | 0.084  | 0.008  | - | 0.161  |
| PRKCZ             | aPKC               | 2750324  | 633                    | 0.033    | 1.000          | -0.085 | 586                      | 0.040    | -0.084 | -0.163 | - | -0.004 |
| PHKG2             | PHK                | 3310358  | 633                    | 0.036    | 1.000          | -0.083 | 586                      | 0.046    | -0.080 | -0.159 | - | -0.001 |
| miR-221-3p        |                    |          |                        |          |                |        |                          |          |        |        |   |        |
| PPP1CB            | PP1                | 6200369  | 741                    | 1.57E-06 | 1.74E-04       | -0.175 | 679                      | 7.98E-07 | -0.187 | -0.260 | - | -0.113 |
| PHKA2             | PHK                | 1050059  | 741                    | 2.61E-06 | 2.90E-04       | 0.172  | 679                      | 5.76E-06 | 0.179  | 0.102  | - | 0.255  |
| PYGB              | PYG                | 4540326  | 741                    | 3.32E-05 | 0.004          | 0.152  | 679                      | 5.93E-05 | 0.152  | 0.079  | - | 0.226  |
| RPS6KB1           | p70S6K             | 1940576  | 741                    | 3.60E-05 | 0.004          | -0.151 | 679                      | 2.57E-04 | -0.142 | -0.218 | - | -0.066 |
| ACACB             | ACC                | 2230678  | 741                    | 4.35E-05 | 0.005          | 0.150  | 679                      | 1.40E-06 | 0.192  | 0.115  | - | 0.270  |
| CBL               | CBL                | 6960209  | 741                    | 1.35E-04 | 0.015          | 0.140  | 679                      | 5.10E-05 | 0.153  | 0.079  | - | 0.226  |
| CALM1             | PHK                | 1660477  | 741                    | 2.82E-04 | 0.031          | 0.133  | 679                      | 2.10E-04 | 0.142  | 0.068  | - | 0.217  |
| PIK3CG            | PI3K               | 3130136  | 741                    | 3.00E-04 | 0.033          | 0.132  | 679                      | 0.021    | 0.087  | 0.013  | - | 0.160  |
| ACACA             | ACC                | 2630692  | 741                    | 0.002    | 0.212          | 0.114  | 679                      | 0.001    | 0.123  | 0.048  | - | 0.199  |
| PRKAG2            | PKA                | 3120279  | 741                    | 0.002    | 0.248          | -0.112 | 679                      | 0.011    | -0.099 | -0.175 | - | -0.022 |
| SOCS4             | SOCS               | 7100082  | 741                    | 0.002    | 0.264          | -0.111 | 679                      | 0.024    | -0.089 | -0.166 | - | -0.012 |
| ACACA             | ACC                | 2190414  | 741                    | 0.006    | 0.648          | 0.101  | 679                      | 0.001    | 0.132  | 0.054  | - | 0.211  |
| PIK3R1            | PI3K               | 6520630  | 741                    | 0.008    | 0.834          | 0.098  | 679                      | 0.005    | 0.114  | 0.035  | - | 0.192  |
| IKBKB             | IKK                | 6660373  | 741                    | 0.008    | 0.874          | 0.098  | 679                      | 0.008    | 0.103  | 0.027  | - | 0.179  |
| PYGL              | PYG                | 2760427  | 741                    | 0.011    | 1.000          | 0.094  | 679                      | 0.047    | 0.072  | 0.001  | - | 0.143  |
| PRKAA1            | PKA                | 6980750  | 741                    | 0.014    | 1.000          | -0.090 | 679                      | 0.009    | -0.103 | -0.179 | - | -0.026 |
| PRKCZ             | aPKC               | 2750324  | 741                    | 0.015    | 1.000          | 0.090  | 679                      | 0.007    | 0.107  | 0.030  | - | 0.185  |
| CBL               | CBL                | 4120037  | 741                    | 0.022    | 1.000          | 0.084  | 679                      | 0.016    | 0.091  | 0.017  | - | 0.166  |
| miR-589-3p        |                    |          |                        |          |                |        |                          |          |        |        |   |        |
| PPP1CB            | PP1                | 6200369  | 738                    | 0.001    | 0.136          | 0.119  | 676                      | 0.001    | 0.125  | 0.050  | - | 0.200  |
| PRKAA1            | PKA                | 4150079  | 738                    | 0.003    | 0.371          | 0.108  | 676                      | 0.010    | 0.099  | 0.023  | - | 0.175  |
| PRKAA1            | PKA                | 6980750  | 738                    | 0.006    | 0.720          | 0.100  | 676                      | 0.001    | 0.129  | 0.052  | - | 0.205  |
| PYGL              | PYG                | 2760427  | 738                    | 0.011    | 1.000          | -0.093 | 676                      | 0.049    | -0.073 | -0.145 | - | -0.001 |

**\*Statistical model:** Stepwise AIC linear regression model including the miRNA of interest, age, sex, BMI, the leukocyte, erythrocyte, and thrombocyte count, glycemic status, as well as glucose, insulin, and HbA1c levels, HbA1c%, and the HOMA2 IR index **Note:** The number of samples in the regression models varies according to the number of samples in which the miRNA was expressed and also according to the availability of the variables in the regression models.

**Supplementary Table S7.** Significant associations between the miRNAs of interest and their predicted targets in the type 2 diabetes mellitus pathway (KEGG hsa04930). Only predicted targets with a  $p < 0.05$  in Spearman's correlation and the linear regression model\* are presented.

| miRNA/gene ID     | Symbol in Figure 2 | Accession | Spearman's correlation |          |                |        | Linear regression model* |          |        |        |   |        |
|-------------------|--------------------|-----------|------------------------|----------|----------------|--------|--------------------------|----------|--------|--------|---|--------|
|                   |                    |           | n                      | p        | p <sub>c</sub> | r      | n                        | p        | β      | 95%CI  |   |        |
| hsa-miR-181a-2-3p |                    |           |                        |          |                |        |                          |          |        |        |   |        |
| PIK3R1            | PI3K               | 1470753   | 739                    | 0.004    | 0.124          | 0.106  | 678                      | 0.034    | 0.083  | 0.006  | – | 0.160  |
| MAPK3             | ERK                | 2060561   | 739                    | 0.012    | 0.392          | -0.093 | 678                      | 0.038    | -0.080 | -0.156 | – | -0.004 |
| let-7a            |                    |           |                        |          |                |        |                          |          |        |        |   |        |
| PKM2              | PYK                | 2030093   | 739                    | 0.006    | 0.194          | -0.101 | 677                      | 0.007    | -0.105 | -0.181 | – | -0.029 |
| HK2               | HK                 | 7150661   | 739                    | 0.001    | 0.046          | 0.117  | 677                      | 0.021    | 0.085  | 0.013  | – | 0.158  |
| PRKCZ             | PKCζ               | 130551    | 739                    | 0.028    | 0.922          | 0.081  | 677                      | 0.050    | 0.078  | 0.000  | – | 0.156  |
| miR-146b-5p       |                    |           |                        |          |                |        |                          |          |        |        |   |        |
| SOCS2             | SOCs               | 6770673   | 741                    | 1.01E-05 | 3.34E-04       | 0.161  | 679                      | 3.46E-04 | 0.134  | 0.061  | – | 0.207  |
| PKM2              | PYK                | 160170    | 741                    | 5.50E-05 | 0.002          | 0.148  | 679                      | 2.48E-05 | 0.159  | 0.086  | – | 0.233  |
| MAPK1             | ERK                | 2570026   | 741                    | 0.001    | 0.045          | -0.117 | 679                      | 6.30E-05 | -0.149 | -0.222 | – | -0.076 |
| IRS2              | IRS                | 6110736   | 741                    | 0.005    | 0.170          | -0.103 | 679                      | 0.022    | -0.087 | -0.161 | – | -0.013 |
| MAPK1             | ERK                | 3180398   | 741                    | 0.019    | 0.615          | -0.086 | 679                      | 0.003    | -0.113 | -0.188 | – | -0.038 |
| PKM2              | PYK                | 2030093   | 741                    | 0.020    | 0.657          | 0.086  | 679                      | 0.018    | 0.094  | 0.016  | – | 0.171  |
| miR-148a-3p       |                    |           |                        |          |                |        |                          |          |        |        |   |        |
| HK1               | HK                 | 1660196   | 633                    | 2.72E-04 | 0.009          | 0.144  | 586                      | 4.15E-05 | 0.163  | 0.085  | – | 0.240  |
| PRKCZ             | PKCζ               | 2750324   | 633                    | 0.033    | 1.000          | -0.085 | 586                      | 0.040    | -0.084 | -0.163 | – | -0.004 |
| miR-221-3p        |                    |           |                        |          |                |        |                          |          |        |        |   |        |
| PKM2              | PYK                | 160170    | 741                    | 4.02E-06 | 1.33E-04       | 0.168  | 679                      | 1.35E-05 | 0.167  | 0.093  | – | 0.242  |
| MAPK3             | ERK                | 3870601   | 741                    | 1.62E-04 | 0.005          | 0.138  | 679                      | 5.22E-05 | 0.156  | 0.081  | – | 0.231  |
| PIK3CG            | PI3K               | 3130136   | 741                    | 3.00E-04 | 0.010          | 0.132  | 679                      | 0.021    | 0.087  | 0.013  | – | 0.160  |
| PKM2              | PYK                | 2030093   | 741                    | 3.56E-04 | 0.012          | 0.131  | 679                      | 2.75E-05 | 0.163  | 0.088  | – | 0.239  |
| SOCS4             | SOCS               | 7100082   | 741                    | 0.002    | 0.078          | -0.111 | 679                      | 0.024    | -0.089 | -0.166 | – | -0.012 |
| PIK3R1            | PI3K               | 6520630   | 741                    | 0.008    | 0.248          | 0.098  | 679                      | 0.005    | 0.114  | 0.035  | – | 0.192  |
| IKBKB             | IKK                | 6660373   | 741                    | 0.008    | 0.260          | 0.098  | 679                      | 0.008    | 0.103  | 0.027  | – | 0.179  |
| PRKCZ             | PKCζ               | 2750324   | 741                    | 0.015    | 0.485          | 0.090  | 679                      | 0.007    | 0.107  | 0.030  | – | 0.185  |
| PRKCD             | PKCε/δ             | 6580039   | 741                    | 0.031    | 1.000          | 0.079  | 679                      | 0.003    | 0.115  | 0.039  | – | 0.192  |

\***Statistical model:** Stepwise AIC linear regression model including the miRNA of interest, age, sex, BMI, the leukocyte, erythrocyte, and thrombocyte count, glycemic status, glucose, insulin, and HbA1c levels, as well as HbA1c% and the HOMA2 IR index. **Note:** The number of samples in the regression models varies according to the number of samples in which the miRNA and mRNA were expressed.

**Supplementary Table S8.** Associations of serum hsa-miR-122-5p (from the subpopulation of the YFS) with serum glucose and insulin levels, as well as the HOMA2 insulin resistance (IR) index, HbA1c, and HbA1c%. Associations were evaluated with Spearman's rank correlation.

|          | <b>n</b> | <b>p-value</b>        | <b>r</b> |
|----------|----------|-----------------------|----------|
| Glucose  | 137      | $2.36 \times 10^{-5}$ | 0.353    |
| Insulin  | 137      | $5.54 \times 10^{-7}$ | 0.412    |
| HOMA2-IR | 137      | $3.56 \times 10^{-7}$ | 0.419    |
| HbA1c    | 137      | 0.851                 | 0.016    |
| HbA1c %  | 137      | 0.758                 | 0.027    |

# Supplementary Table S9.

Previously reported associations between the miRNAs of interest and phenotypes related to type 2 diabetes

|               | Circulatory levels affected by |                 |                  |                 | Tissue levels affected by*      | Associated with    |                   | Regulates            |                      | Is regulated by      |
|---------------|--------------------------------|-----------------|------------------|-----------------|---------------------------------|--------------------|-------------------|----------------------|----------------------|----------------------|
|               | T2D                            | T1D             | Pre-diabetes     | Fatty liver     | T2D                             | Obesity/Adipocytes | Inflammation      | Insulin secretion    | Glucose metabolism   | Glucose levels       |
| let-7a-5p     | ↓ <sup>1</sup>                 |                 |                  |                 |                                 |                    |                   |                      |                      |                      |
| miR-15b-3p    | ↓ <sup>2</sup>                 |                 |                  |                 | Yes <sup>3</sup><br>(Muscle)    |                    |                   | Yes <sup>4</sup>     |                      |                      |
| miR-18a-3p    | ↓ <sup>5</sup>                 |                 |                  |                 |                                 |                    |                   |                      |                      |                      |
| miR-93-3p     |                                | ↓ <sup>6</sup>  | ↓ <sup>7,8</sup> |                 |                                 | Yes <sup>9</sup>   |                   |                      | Yes <sup>8</sup>     | Yes <sup>10</sup>    |
| miR-122-5p    |                                |                 |                  | ↑ <sup>11</sup> |                                 |                    |                   |                      |                      |                      |
| miR-144-5p    | ↑ <sup>12-14</sup>             |                 |                  |                 |                                 |                    |                   |                      | Yes <sup>14-15</sup> |                      |
| miR-146b-5p   |                                |                 |                  |                 |                                 | Yes <sup>16</sup>  | Yes <sup>17</sup> |                      |                      |                      |
| miR-148a-3p   | ↑ <sup>18</sup>                | ↑ <sup>19</sup> | ↓ <sup>18</sup>  |                 |                                 | Yes <sup>20</sup>  |                   |                      |                      |                      |
| miR-181a-2-3p | ↑ <sup>21</sup>                | ↑ <sup>19</sup> |                  |                 |                                 |                    |                   |                      |                      |                      |
| miR-184       |                                |                 |                  |                 |                                 |                    |                   | Yes <sup>22,23</sup> |                      | Yes <sup>24</sup>    |
| miR-221-3p    |                                |                 |                  |                 | Yes (Artery wall) <sup>25</sup> |                    | Yes <sup>17</sup> |                      |                      | Yes <sup>26,27</sup> |
| miR-339-3p    |                                |                 |                  |                 |                                 |                    |                   |                      | Yes <sup>28</sup>    |                      |
| miR-885-5p    |                                |                 |                  | ↑ <sup>11</sup> |                                 |                    |                   |                      |                      |                      |
| miR-589-3p    |                                |                 |                  |                 |                                 |                    |                   |                      |                      |                      |
| miR-642a-5p   |                                |                 |                  |                 |                                 | Yes <sup>29</sup>  |                   |                      |                      |                      |

\* Tissue in parenthesis

1-8, 9, 10, 11, 12-14, 14, 15, 16, 17, 18, 19, 20, 21, 22, 23, 24, 25, 26, 27, 28, 29

# 1    **Supplementary Materials and Methods**

## 2    **The Young Finns Study (YFS)**

3    The YFS is a multicenter follow-up study on cardiovascular risk from childhood to adulthood in Finland. The  
4    YFS was launched in 1980, when 3,596 children and adolescents (aged 3–18 years) participated in the baseline  
5    study<sup>30</sup>. The subjects were randomly selected from the Finnish national register among the chosen age groups  
6    and the five study districts. Thereafter, the subjects have been followed (in 1986, 2001, 2007, and 2011) with  
7    several examinations, including comprehensive risk factor assessments. The 30-year follow-up was performed in  
8    2011, with 2,063 adults, aged 34–49 years, participating in the study. The examinations included physical  
9    measurements, blood tests, and questionnaires. Participants in the follow-up studies have been found to be more  
10   often women and older than those who dropped out, but no significant differences in risk factors have been  
11   found<sup>30</sup>. The present study has been approved by the 1st Ethical Committee of the Hospital District of Southwest  
12   Finland on September 21st, 2010, and by local ethical committees (1st Ethical Committee of the Hospital District  
13   of Southwest Finland, Regional Ethics Committee of the Expert Responsibility area of Tampere University  
14   Hospital, the Helsinki University Hospital Ethical Committee of Medicine, the Research Ethics Committee of the  
15   Northern Savo Hospital District, and the Ethics Committee of the Northern Ostrobothnia Hospital District). All  
16   study subjects gave an informed consent, and the study was conducted according to the principles of the  
17   Declaration of Helsinki. In the earlier follow-ups involving also underage participants, informed consent was  
18   obtained from a parent and/or legal guardian. The YFS samples for miRNA analysis (n=992) were selected  
19   independently of glycemic status from individuals with the most comprehensive data on risk factors,  
20   metabolomics, transcriptomics, genome-wide genotyping, and other phenotyping in the follow-up studies  
21   performed in 1986, 2001, 2007, and 2011. After quality control, the study population comprises 871 individuals  
22   with successful miRNA profiling (demographics in Supplementary Table 1).

## 23   **Clinical and biochemical measurements**

24   Weight and height were measured, and BMI was calculated as weight(kg)/height(m)<sup>2</sup>. Waist circumference was  
25   measured to the nearest 0.1 cm. Blood pressure was measured with a random zero sphygmomanometer. Venous  
26   blood samples were drawn from the right antecubital vein after an overnight fast. For blood count analysis, whole  
27   blood was anticoagulated with EDTA. Blood cell parameters were measured with flow cytometric particle  
28   counting (cells) and photometry (Hb) using Sysmex XE- 5000 and XT-2000i analyzers (Sysmex Corporation)  
29   with reagents provided by the manufacturer (Cellpack and Sulfolyser).

30   For the biochemical measurements, serum was separated, aliquoted, and stored at -70°C until analysis. Glucose,  
31   cholesterol, and triglyceride concentrations were measured with Glucose, Cholesterol, and Triglycerides System  
32   Reagent (Beckman Coulter Biomedical). The serum triglyceride concentration was assayed using the enzymatic  
33   glycerol kinase–glycerol phosphate oxidase method (Beckman Coulter Biomedical). Serum total cholesterol  
34   levels were measured by the enzymatic cholesterol esterase–cholesterol oxidase method (Beckman Coulter  
35   Biomedical). The same reagent was used for estimating HDL cholesterol levels after the precipitation of low-  
36   density lipoprotein (LDL) and very low-density lipoprotein (VLDL) with dextran sulfate- Mg<sup>2+</sup>. Serum glucose  
37   concentrations were determined by the enzymatic hexokinase method (Beckman Coulter Biomedical). All the  
38   above-mentioned assays were performed on an AU400 instrument (AU400, Olympus).

39   Glycated hemoglobin (HbA1c) fraction in whole blood was measured by an Abbott Architect ci8200 analyzer  
40   (Abbott Laboratories). The concentration of total hemoglobin was first determined colorimetrically, after which  
41   the concentration of HbA1c was measured immunoturbidimetrically using the microparticle agglutination  
42   inhibition method (Fisher Diagnostics). These two concentrations were used to calculate the HbA1c percentage  
43   (HbA1c%). Insulin levels were measured with a microparticle enzyme immunoassay kit (Abbott Laboratories,

Chicago, IL), and the HOMA2 index was calculated according to the online HOMA2-IR calculator (<https://www.dtu.ox.ac.uk/homacalculator/>).

### **Categorizing individuals according to T2D and glycemic status**

Individuals were categorized into the normoglycemic (NG), IFG, and T2D groups. The classification of IFG was based on fasting serum glucose and HbA1c according to the criteria of the WHO<sup>31</sup>. Individuals with IFG, were defined as having a fasting serum glucose level of 5.60–6.99 mmol/l or a HbA1c of 5.7%–6.4% (38–46 mmol/mol) and not diagnosed with T2D. The diagnosis of T2D included subjects with a fasting plasma glucose level of over 7.0 mmol/l or HbA1c of over 6.5% (48 mmol/mol), or those with reported use of oral glucose-lowering medication or insulin (but had not reported having type 1 diabetes) or who had a reported diagnosis of T2D by a physician. Individuals with type 1 diabetes were discarded from analysis.

### **Whole blood RNA isolation, quality control, and miRNA expression profiling**

Whole blood (2.5 ml) was collected into PaXgene Blood RNA Tubes (PreAnalytix). The tubes were inverted 8–10 times and then stored at room temperature for at least 2 hours. The tubes were frozen (–80°C) and thawed overnight before RNA isolation (both miRNA and total RNA) with a PAXgene Blood MicroRNA Kit (Qiagen) including the DNase Set using the QiaCube extraction robot. The concentrations and purity of the RNA samples were evaluated spectrophotometrically (BioPhotometer, Eppendorf). The RNA isolation process was validated by analyzing the integrity of several RNAs with the RNA 6000 Nano Chip Kit (Agilent). The presence of the small RNA fraction was confirmed by the Agilent Small RNA Kit (Agilent).

MicroRNA expression profiling was performed with the TaqMan® OpenArray® MicroRNA Panel (Applied Biosystems) containing 758 microRNAs. In brief, 100 ng of RNA was used to run both A and B pools of Megaplex (Applied Biosystems) preamplification for cDNA synthesis. In the OpenArray Sample Loading Plate, 22.5 µl of each preamplified pool was mixed 1:1 with TaqMan OpenArray Real-Time PCR Master Mix. MicroRNA panels were loaded using the AccuFill System and run with the QuantStudio 12K Flex (Applied Biosystems).

Primary data analysis was performed with Expression Suite Software version 1.0.1. As recommended by the manufactures of the miRNA panels, RNU6, RNU44, and RNU48 were used as housekeeping small RNAs. Assays with an Amplification score of >1 and Cq Confidence of >0.7 were accepted. Ninety-five samples were excluded due to a low number of miRNAs expressed (≤200 miRNAs per sample), and in further analysis, 243 miRNAs that were expressed in at least 2/3 of the samples were included. The number of miRNAs present in detectable levels in the majority of the blood samples was well in line with a previous similar analysis of blood tissue<sup>32</sup>. The RNA quality and functionality of the TaqMan OpenArray microRNA expression panels have been validated previously<sup>33</sup>. After quality control and removal of outlier miRNAs, profiling was successful on 871 samples. To correct for batch effects, the principal component analysis was performed for the miRNA expression data. The data was adjusted for 10 of the first 20 principal components from the principal component analysis.

### **Serum RNA isolation and miRNA expression profiling**

For serum miRNA isolation, the serum was thawed, and miRNAs were isolated from 200 µl of serum with the miRNeasy Serum/Plasma Kit (Qiagen) including the DNase Set using the QiaCube. MicroRNA expression profiling was performed with the same TaqMan® OpenArray® MicroRNA Panel (Life Technologies) as from whole blood, but scaled-down Low Sample Protocol was used for serum samples. In comparison to the standard protocol, 10 µl of the miRNA eluate was used in cDNA synthesis for both A and B pools of Megaplex, and 7.5 µl of cDNA was the preamplified (total reaction volume 18 µl) and diluted with the final dilution ratio of 1:10 with nuclease free water and TE buffer.

Also, for serum data, only assays with an Amplification score of >1 and Cq Confidence of >0.7 were accepted, and all 146 samples passed quality control. Due to the lower number of samples, miRNAs expressed in at least ½



of the samples were included in the data. The serum data was normalized with the global mean normalization approach in R language<sup>4</sup>. The approach involves the calculation of a normalization factor as the global mean of all expressed miRNAs per sample. Further, between-sample normalization was performed with the quantile normalization method. Batch correction, when needed, was accomplished with ComBat<sup>5</sup>.

## Genome-wide expression analysis (transcriptomics)

The expression levels were analyzed with an Illumina HumanHT-12 version 4 Expression BeadChip (Illumina Inc.). Utilizing the same RNA sample for both mRNA and miRNA expression profiling, 200 ng of RNA was reverse-transcribed into cDNA and biotin-UTP-labeled using the Illumina TotalPrep RNA Amplification Kit (Ambion); 1,500 ng of cDNA was then hybridized onto the Illumina HumanHT-12 v4 Expression BeadChip. The BeadChips were scanned with the Illumina iScan system. Raw Illumina probe data was exported from Genomestudio and analyzed in R (<http://www.r-project.org/>) using the Bioconductor (<http://www.bioconductor.org/>) packages. The expression data was processed using nonparametric background correction, followed by quantile normalization with control and expression probes, using the neqc function in the limma package and log<sub>2</sub> transformation. The data processing has been described in more detailed in an article by Elovainio et al.<sup>34</sup>. The expression analysis was successful in 743 of the 871 samples with a miRNA expression profile.

## Statistical analysis

MicroRNA expressions differences over glycemic status groups were analyzed by Kruskal-Wallis analysis of variance, after which the different glycemic status groups (i.e., NG vs. IFG, NG vs. T2D and IFG vs. T2D) were compared by using the Mann-Whitney U test. In order to take account of the multiple testing, conservative Bonferroni-corrected p-values ( $p_c$ -value) were calculated, and a  $p_c$ -value of  $<0.05$  ( $=p<0.00021$ ) was considered significant. For dysregulated miRNAs, fold changes (FCs) were calculated for each individual sample in comparison to the average of all NG individuals. To analyze whether dysregulated miRNAs were independent predictors of IFG or T2D, a stepwise Akaike information criterion (AIC) logistic regression model was utilized. Two different models were used as follows: Model 1 = the dependent variable was glycemic status (IFG/T2D vs. NG and T2D vs. IFG, one by one) predicted with the discovered miRNAs (forced in to the model one by one), age, sex, and BMI; and Model 2 = Model 1 + the leukocyte, erythrocyte, and thrombocyte count, as well as total cholesterol, LDL, HDL and triglyceride levels, in addition to alcohol consumption and the history of smoking and hypertension. In regression models,  $p<0.05$  was considered significant. The number of samples in the regression models varied according to the number of samples in which the miRNA was expressed and also according to the availability of the variables in the regression models, as all measurements were not successful/available from all of the samples.

The association of miRNA levels with glucose, insulin, HbA1c (mmol/mol), HbA1c%, and the HOMA2 IR index were correlated with Spearman's rank-order correlation.  $P_c$ -value $<0.05$  was considered significant. Independent prediction value was evaluated with linear regression models. Model 1: dependent variable one by one (i.e. glucose, HbA1c, HbA1c%, insulin, and HOMA2 IR index) predicted with the discovered miRNAs (forced in to the model one by one), as well as age, sex, and BMI; and Model 2: Model 1 + the leukocyte, erythrocyte, and thrombocyte count, as well as total cholesterol, LDL, HDL, and triglyceride levels, in addition to alcohol consumption, the history of smoking and hypertension, and glycemic status (NG/IFG/T2D). Glycemic status-stratified analyzes were performed as in the whole population, with the exception of glycemic status not being included in Model 2. In regression models,  $p<0.05$  was considered significant.

To analyze the co-regulation of the miRNAs of interest and the existence of possible expression clusters of these miRNAs, between-miRNA Spearman's rank-order correlations were analyzed. Also, to validate our results, we analyzed the differences in hsa-miR-144-5p and hsa-let-7a-5p over the glycemic status groups from the miRNA data profiled with Human MiRNA Microarray Release 14.0, 8 × 15 K (Agilent) from whole blood of 72 individuals included in the YFS 2011 follow-up. The sample preparation, miRNA profiling, and data

1 preprocessing have been described previously<sup>20</sup>. Differences in microRNA expressions between the glycemic  
2 status groups were analyzed as with the larger data set from whole blood, and hsa-miR-144-5p and hsa-let-7a-5p  
3 were selected as they were available in both arrays and gave significant results in the non-parametric tests.

4 To analyze the possibility that miRNAs associated with the individuals' glycemic status, glucose levels, or  
5 indicators of insulin resistance are expressed particularly in certain circulatory blood cells, we correlated the levels  
6 of these miRNAs with the leukocyte, erythrocyte, and thrombocyte counts using Spearman's rank-order  
7 correlation. In addition, we investigated whether some of the miRNAs were originating solely from serum by  
8 replicating the non-parametric tests and the correlations between the miRNAs of interest and glycemic status and  
9 the indicators of glucose metabolism in the serum miRNA profilings performed with TaqMan® OpenArray®  
10 MicroRNA Panels from a subpopulation (n=146) of the YFS (see supplementary materials and methods).

11 In the target mRNA analysis, Spearman's rank-order correlations were performed between the FCs of the  
12 miRNAs of interest (miRNAs with significantly different levels between glycemic status groups or significant  
13 correlation with glucose, insulin, HbA1c, HbA1c% levels, or the HOMA2 index in whole population) and the  
14 expression of their predicted targets (predicted by two or more algorithms according to miRGator v.3.0,  
15 <http://mirgator.kobic.re.kr/>). Transcripts with a correlation  $p < 0.05$  were included in the pathway enrichment  
16 analysis performed for the KEGG pathways in the molecular signatures database  
17 (<http://software.broadinstitute.org/gsea/msigdb/index.jsp>). Pathways with an FDR-q value of  $< 0.05$  were  
18 considered significantly enriched with target mRNAs. The most significant pathways were further analyzed for  
19 coregulation of all the miRNAs of interest. All predicted targets (predicted by at least one algorithm in miRGator  
20 3.0) from at least one of the miRNAs of interest were selected from the most significantly enriched pathways and  
21 correlated (Spearman's rank order correlation) with their predicted regulatory miRNA levels. The predicted target  
22 mRNAs with significant correlation ( $p < 0.05$ ) were included in further analysis. The independent statistical  
23 prediction values of the miRNAs of interest on the target mRNA levels were evaluated with an AIC linear  
24 regression model including the miRNA of interest, age, sex, BMI, the leukocyte, erythrocyte, and thrombocyte  
25 count, glycemic status, as well as glucose, insulin, and HbA1c levels, and HbA1c% and the HOMA2 IR index.  
26 Transcripts whose levels were significantly ( $p < 0.05$ ) and independently statistically predicted by the levels of the  
27 miRNAs of interest were considered to be affected by these miRNAs.

## 28 **Availability of the data**

29 The datasets generated and/or analyzed during the current study are not publicly available due to restrictions  
30 imposed by Finnish legislation. However, data sharing is possible upon reasonable request and all decisions are  
31 made by the YFS Publication and Data Sharing board.

32

## 1    **Supplementary references**

### 2    References

- 3    1. Santovito, D. *et al.* Plasma exosome microRNA profiling unravels a new potential modulator of adiponectin  
4    pathway in diabetes: effect of glycemic control. *J. Clin. Endocrinol. Metab.* **99**, E1681-5 (2014).
- 5    2. Pescador, N. *et al.* Serum circulating microRNA profiling for identification of potential type 2 diabetes and  
6    obesity biomarkers. *PLoS One* **8**, e77251 (2013).
- 7    3. Bork-Jensen, J. *et al.* Glucose tolerance is associated with differential expression of microRNAs in skeletal  
8    muscle: results from studies of twins with and without type 2 diabetes. *Diabetologia* **58**, 363-373 (2015).
- 9    4. Su, Y. *et al.* Maternal Low Protein Isocaloric Diet Suppresses Pancreatic beta-Cell Proliferation in Mouse  
10    Offspring via miR-15b. *Endocrinology* **157**, 4782-4793 (2016).
- 11    5. Mao, G. & Liu, L. microRNA-18a is a genetic marker for the early diagnosis of cerebral injury induced by  
12    type 2 diabetes. *Exp. Ther. Med.* **8**, 1901-1905 (2014).
- 13    6. Nunez Lopez, Y. O., Garufi, G. & Seyhan, A. A. Altered levels of circulating cytokines and microRNAs in  
14    lean and obese individuals with prediabetes and type 2 diabetes. *Mol. Biosyst* **13**, 106-121 (2016).
- 15    7. Salas-Perez, F. *et al.* MicroRNAs miR-21a and miR-93 are down regulated in peripheral blood mononuclear  
16    cells (PBMCs) from patients with type 1 diabetes. *Immunobiology* **218**, 733-737 (2013).
- 17    8. Yan, S. T. *et al.* MiR-199a is overexpressed in plasma of type 2 diabetes patients which contributes to type 2  
18    diabetes by targeting GLUT4. *Mol. Cell. Biochem.* **397**, 45-51 (2014).
- 19    9. Wu, Y. *et al.* Identification of miR-106b-93 as a negative regulator of brown adipocyte differentiation.  
20    *Biochem. Biophys. Res. Commun.* **438**, 575-580 (2013).
- 21    10. Long, J., Wang, Y., Wang, W., Chang, B. H. & Danesh, F. R. Identification of microRNA-93 as a novel  
22    regulator of vascular endothelial growth factor in hyperglycemic conditions. *J. Biol. Chem.* **285**, 23457-23465  
23    (2010).
- 24    11. Raitoharju, E. *et al.* Blood hsa-miR-122-5p and hsa-miR-885-5p levels associate with fatty liver and related  
25    lipoprotein metabolism-The Young Finns Study. *Sci. Rep.* **6**, 38262 (2016).
- 26    12. Wang, X. *et al.* Determination of 14 circulating microRNAs in Swedes and Iraqis with and without diabetes  
27    mellitus type 2. *PLoS One* **9**, e86792 (2014).
- 28    13. Yan, S. *et al.* Differential expression of microRNAs in plasma of patients with prediabetes and newly  
29    diagnosed type 2 diabetes. *Acta Diabetol.* **53**, 693-702 (2016).
- 30    14. Karolina, D. S. *et al.* MicroRNA 144 impairs insulin signaling by inhibiting the expression of insulin  
31    receptor substrate 1 in type 2 diabetes mellitus. *PLoS One* **6**, e22839 (2011).
- 32    15. Liu, M., Gao, J., Huang, Q., Jin, Y. & Wei, Z. Downregulating microRNA-144 mediates a metabolic shift in  
33    lung cancer cells by regulating GLUT1 expression. *Oncol. Lett.* **11**, 3772-3776 (2016).

16. Ahn, J., Lee, H., Jung, C. H., Jeon, T. I. & Ha, T. Y. MicroRNA-146b promotes adipogenesis by suppressing the SIRT1-FOXO1 cascade. *EMBO Mol. Med.* **5**, 1602-1612 (2013).
17. Marques-Rocha, J. L. *et al.* Noncoding RNAs, cytokines, and inflammation-related diseases. *FASEB J.* **29**, 3595-3611 (2015).
18. Seyhan, A. A. *et al.* Pancreas-enriched miRNAs are altered in the circulation of subjects with diabetes: a pilot cross-sectional study. *Sci. Rep.* **6**, 31479 (2016).
19. Nielsen, L. B. *et al.* Circulating levels of microRNA from children with newly diagnosed type 1 diabetes and healthy controls: evidence that miR-25 associates to residual beta-cell function and glycaemic control during disease progression. *Exp. Diabetes Res.* **2012**, 896362 (2012).
20. Shi, C. *et al.* Adipogenic miRNA and meta-signature miRNAs involved in human adipocyte differentiation and obesity. *Oncotarget* **7**, 40830-40845 (2016).
21. Zhou, B. *et al.* Downregulation of miR-181a upregulates sirtuin-1 (SIRT1) and improves hepatic insulin sensitivity. *Diabetologia* **55**, 2032-2043 (2012).
22. Bolmeson, C. *et al.* Differences in islet-enriched miRNAs in healthy and glucose intolerant human subjects. *Biochem. Biophys. Res. Commun.* **404**, 16-22 (2011).
23. Morita, S., Horii, T., Kimura, M. & Hatada, I. MiR-184 regulates insulin secretion through repression of Slc25a22. *PeerJ* **1**, e162 (2013).
24. Tattikota, S. G. *et al.* miR-184 Regulates Pancreatic beta-Cell Function According to Glucose Metabolism. *J. Biol. Chem.* **290**, 20284-20294 (2015).
25. Coleman, C. B. *et al.* Elevation of miR-221 and -222 in the internal mammary arteries of diabetic subjects and normalization with metformin. *Mol. Cell. Endocrinol.* **374**, 125-129 (2013).
26. Li, Y. *et al.* MicroRNA-221 regulates high glucose-induced endothelial dysfunction. *Biochem. Biophys. Res. Commun.* **381**, 81-83 (2009).
27. Silambarasan, M. *et al.* MicroRNAs in Hyperglycemia Induced Endothelial Cell Dysfunction. *Int. J. Mol. Sci.* **17**, 518 (2016).
28. Jia, Y. *et al.* Maternal low-protein diet induces gender-dependent changes in epigenetic regulation of the glucose-6-phosphatase gene in newborn piglet liver. *J. Nutr.* **142**, 1659-1665 (2012).
29. Zaragosi, L. E. *et al.* Small RNA sequencing reveals miR-642a-3p as a novel adipocyte-specific microRNA and miR-30 as a key regulator of human adipogenesis. *Genome Biol.* **12**, R64-2011-12-7-r64 (2011).
30. Raitakari, O. T. *et al.* Cohort profile: the cardiovascular risk in Young Finns Study. *International journal of epidemiology* **37**, 1220-6 (2008).
31. World Health Organization. Global report on diabetes. *Geneva* (2016).

- 1 32. Leidinger, P., Backes, C., Meder, B., Meese, E. & Keller, A. The human miRNA repertoire of different  
2 blood compounds. *BMC Genomics* **15**, 474-2164-15-474 (2014).
- 3 33. Raitoharju, E. *et al.* Blood microRNA profile associates with the levels of serum lipids and metabolites  
4 associated with glucose metabolism and insulin resistance and pinpoints pathways underlying metabolic  
5 syndrome: The cardiovascular risk in Young Finns Study. *Mol. Cell. Endocrinol.* **391**, 41-49 (2014).
- 6 34. Elovainio, M. *et al.* Activated immune-inflammatory pathways are associated with long-standing depressive  
7 symptoms: Evidence from gene-set enrichment analyses in the Young Finns Study. *J. Psychiatr. Res.* **71**, 120-  
8 125 (2015).

9
